# Supplementary material for: Protective effects of a nanoemulsion adjuvant vaccine (2C-Staph/NE) administered intranasally against invasiveStaphylococcus aureuspneumonia
Source: Royal Society of Chemistry journal article supplement (doi:10.1039/c7ra13630g), 2018-01-01
Supplement: c7ra13630g1.pdf [file c7ra13630g1.pdf]

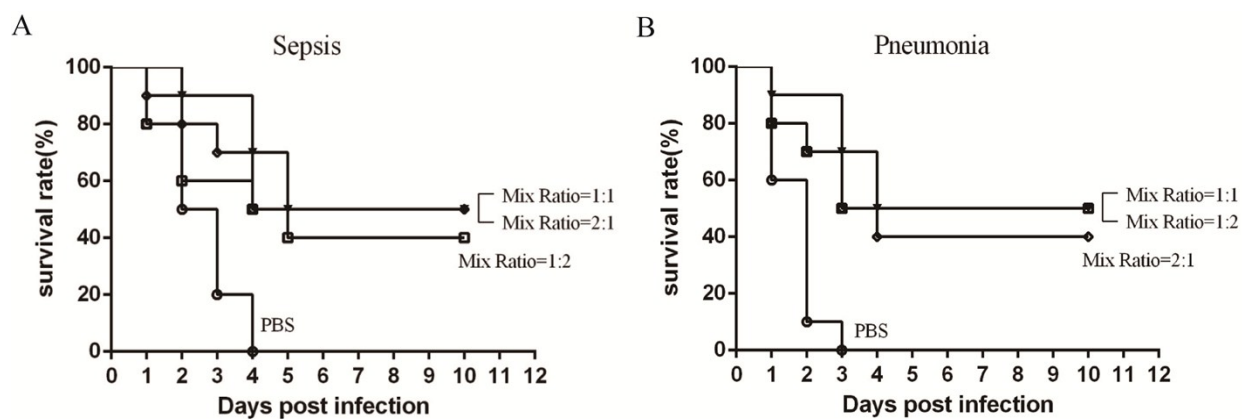

Figure S1. Survival rates of different protein mix ratios (w/w) in the sepsis and pneumonia models.

BALB/c mice ( $n = 10$  per group) were immunised with different mix ratios of rMntC and rSEB (w/w; 2:1, 1:1 and 1:2). The mice were intravenously infected with MRSA 252 ( $1 \times 10^9$  CFUs) or intranasally infected with MRSA 252 ( $1 \times 10^8$  CFUs), and the survival rates were monitored for 10 days.

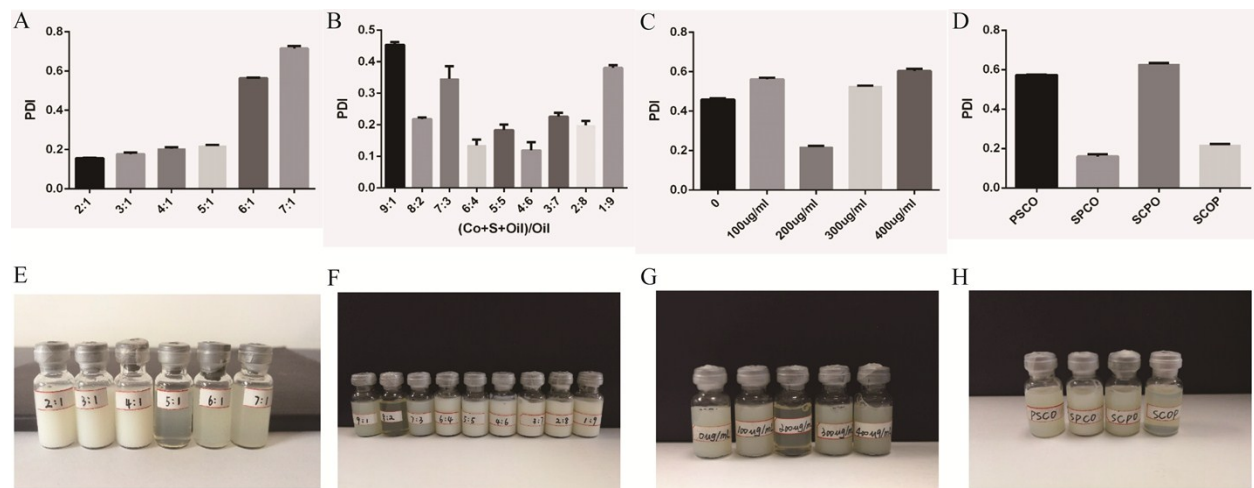

Figure S2. Influence of the different Smixes, oil ratios, addition orders and protein concentrations on the PDI and appearance.

(A-D) PDI values of the NE vaccine were detected by Nano ZS. The results are shown as the mean  $\pm$  SD. (E-H) Appearances were captured by a camera (Nikon).
